# Supplementary material for: Where Is the Way Forward for New Media Empowering Public Health? Development Strategy Options Based on SWOT-AHP Model
Source: MDPI journal article supplement (doi:10.3390/ijerph191912813), 2022-10-06
Supplement: s1 [file s1]

**Supplementary Table S1.**

| Group             | Sub-factors | Accept or Reject (√ OR ×) | Estimated intensity                                                                |
|-------------------|-------------|---------------------------|------------------------------------------------------------------------------------|
| Strengths (S)     | S1          |                           | 1-5 (The higher the absolute value of the score, the more important it is)         |
|                   | S2          |                           |                                                                                    |
|                   | S3          |                           |                                                                                    |
|                   | S4          |                           |                                                                                    |
| Opportunities (O) | O1          |                           |                                                                                    |
|                   | O2          |                           |                                                                                    |
|                   | O3          |                           |                                                                                    |
|                   | O4          |                           |                                                                                    |
| Weakness (W)      | W1          |                           | (-1) - (-5) (The higher the absolute value of the score, the more important it is) |
|                   | W2          |                           |                                                                                    |
|                   | W3          |                           |                                                                                    |
| Threats (T)       | T1          |                           |                                                                                    |
|                   | T2          |                           |                                                                                    |
|                   | T3          |                           |                                                                                    |

**Supplementary Table S2.** Using S group to explain.

| Comparisons among subfactors within group S |                     |                   |                                        |                    |                                     |                                                                                                                                       |
|---------------------------------------------|---------------------|-------------------|----------------------------------------|--------------------|-------------------------------------|---------------------------------------------------------------------------------------------------------------------------------------|
| Equal Importance                            | Moderate importance | Strong importance | Very strong or demonstrated importance | Extreme importance | Importance between the above levels | If sub-factor A is less important than sub-factor B, then Intensity of Importance of A is the inverse of Intensity of Importance of B |
| 1                                           | 3                   | 5                 | 7                                      | 9                  | 2,4,6,8                             | 1/2,1/3,1/4,1/5,1/6,1/7,1/8,1/9                                                                                                       |
| S                                           |                     |                   |                                        |                    |                                     | S                                                                                                                                     |
| 1                                           |                     |                   |                                        |                    |                                     | 1                                                                                                                                     |
| S                                           |                     |                   |                                        |                    |                                     | S                                                                                                                                     |

|   |   |
|---|---|
| 1 | 2 |
| S | S |
| 1 | 3 |
| S | S |
| 1 | 4 |
| S | S |
| 2 | 1 |
| S | S |
| 2 | 2 |
| S | S |
| 2 | 2 |
| S | S |
| 2 | 2 |
| S | S |
| 3 | 3 |
| S | S |
| 3 | 3 |
| S | S |
| 3 | 3 |
| S | S |
| 3 | 3 |
| S | S |
| 4 | 4 |
| S | S |
| 4 | 4 |
| S | S |
| 4 | 4 |
| S | S |
| 4 | 4 |
